without severe comorbidity in whom complete locoregional resection of primary ACC can be achieved. Detailed scrutiny of the literature revealed that there are few cases in which resection of the IVC with graft replacement was performed [9, 10]. In all these cases, the tumor was located on the right side and in 1 case tumor extension was up to the right atrium [9]. Chiche et al. [5] reported 15 cases and reviewed the literature regarding this rare pathology. Only 3 cases (all were right-sided) required resection of the vena cava and graft replacement, and none needed opposite side renal vein resection and graft replacement in this review. This is the first ACC case in which the IVC and opposite side renal vein were replaced.

Chiche et al. [5] also reported that 52.3% of patients with IVC extensions who underwent resection were alive

with metastasis or no evidence of recurrence after a mean follow-up time of  $23.1 \pm 20.4$  months. Although the response rate of mitotane therapy has been reported to be up to 35% with mostly partial and transient responses, its clinical efficacy remains disputed [6]. However, in the literature there are cases in which complete lasting remission was achieved after mitotane treatment [6]. Despite mitotane's significant side effects, such as lifelong steroid replacement, treatment with mitotane should be considered for cases of metastatic disease.

In conclusion, a detailed preoperative workup should be done before attempting such an aggressive surgical procedure. In carefully selected patients who require palliation because of thrombus extension of ACC, surgical therapy might facilitate adjuvant therapies even in cases of metastases and may provide a survival benefit.

## References

- 1 Dackiw AP, Lee JE, Gagel RF, Evans DB: Adrenal cortical carcinoma. *World J Surg* 2001; 25:914–926.
- 2 Cohn K, Gottesman L, Brennan M: Adrenocortical carcinoma. *Surgery* 1986;100:1170–1177.
- 3 Hedican SP, Marshall FF: Adrenocortical carcinoma with intracaval extension. *J Urol* 1997;158:2056–2061.
- 4 Bodie B, Novick AC, Pontes JE, Straffon RA, Montie JE, Babiak T, Sheeler L, Schumacher P: The Cleveland Clinic experience with adrenal cortical carcinoma. *J Urol* 1989;141: 257–260.
- 5 Chiche L, Dousset B, Kieffer E, Chapuis Y: Adrenocortical carcinoma extending into the inferior vena cava: presentation of a 15-patient series and review of the literature. *Surgery* 2006;139:15–27.
- 6 Figueroa AJ, Stein JP, Lieskovsky G, Skinner DG: Adrenal cortical carcinoma associated with venous tumour thrombus extension. *Br J Urol* 1997;80:397–400.
- 7 Cahill PJ, Sukov RJ: Inferior vena caval involvement by adrenal cortical carcinoma. *Urology* 1977;10:604–607.
- 8 Haak HR, Hermans J, van de Velde CJ, Lentjes EG, Goslings BM, Fleuren GJ, Krans HM: Optimal treatment of adrenocortical carcinoma with mitotane: results in a consecutive series of 96 patients. *Br J Cancer* 1994;69:947–951.
- 9 Friedrich MG, Dill H, Unverdorben M, Engels G, Scheele H, Bachmann K: Adrenal carcinoma with intravenous extension into the tricuspid valvular plan in a patient with patent foramen ovale. *Eur Heart J* 1994;15:708–709.
- 10 Huguet C, Ferri M, Gavelli A: Resection of the suprarenal inferior vena cava. The role of prosthetic replacement. *Arch Surg* 1995;130: 793–797.

## Erratum

In the article 'Fibroepithelial polyp of distal ureter with periodic prolapse into bladder' (*Urol Int* 2008;80:338–340), the name of the second author was misspelled. It should now read: Apostolos Kafetsoulis.
